# A class of synaptic signaling molecules required for homeostatic potentiation also tunes homeostatic depression

1 Catherine J. Yeates<sup>1,2,4</sup>, C. Andrew Frank<sup>1,2,3</sup>

2 <sup>1</sup> Department of Anatomy and Cell Biology, University of Iowa Carver College of Medicine, Iowa  
3 City, IA, USA

4 <sup>2</sup> Interdisciplinary Graduate Program in Neuroscience, University of Iowa, Iowa City, IA, USA

5 <sup>3</sup> Iowa Neuroscience Institute, University of Iowa Carver College of Medicine, Iowa City, IA, USA

6 <sup>4</sup> Present Address: Department of Biology, University of Dayton, Dayton, OH, USA

7 \* **Correspondence:**

8 C. Andrew Frank

9 andy-frank@uiowa.edu

10 **Keywords:** synapse, homeostasis, depression, *Drosophila melanogaster*, NMJ, neurotransmission, plasticity

12

## 13 Abstract

14 Synapses and circuits rely on homeostatic forms of regulation in order to transmit meaningful infor-  
15 mation. The *Drosophila melanogaster* neuromuscular junction (NMJ) is a well-studied synapse that  
16 shows robust homeostatic control of function. Most prior studies of homeostatic plasticity at the NMJ  
17 have centered on presynaptic homeostatic potentiation (PHP). PHP happens when postsynaptic muscle  
18 neurotransmitter receptors are impaired, triggering retrograde signaling that causes an increase in pre-  
19 synaptic neurotransmitter release. As a result, normal levels of evoked excitation are maintained. The  
20 counterpart to PHP at the NMJ is presynaptic homeostatic depression (PHD). Overexpression of the  
21 *Drosophila* vesicular glutamate transporter (VGlut) causes an increase in the amplitude of spontaneous  
22 events. PHD happens when the synapse responds to the challenge by decreasing quantal content during  
23 evoked neurotransmission – again, resulting in normal levels of postsynaptic excitation.

24 We hypothesized that there may exist a class of molecules that affects both PHP and PHD. Impairment  
25 of any such molecule could hurt a synapse’s ability to respond to any significant homeostatic challenge.  
26 We conducted an electrophysiology-based screen for blocks of PHD. While we did not observe a block  
27 of PHD in the genetic conditions screened, we instead found loss-of-function conditions that led to  
28 excess depression – i.e., a substantial deficit in evoked amplitude when combined with VGlut overex-  
29 pression. The conditions causing this phenotype included a double heterozygous loss-of-function con-  
30 dition for genes encoding the inositol trisphosphate receptor (IP<sub>3</sub>R – *itpr*) and ryanodine receptor (*RyR*).  
31 IP<sub>3</sub>Rs and RyRs gate calcium release from intracellular stores. Pharmacological agents targeting IP<sub>3</sub>R  
32 and RyR recapitulated the genetic losses of these factors, as did lowering calcium levels from other  
33 sources. Our data are consistent with the idea that some factors required for homeostatic potentiation  
34 are also required for the synapse to achieve appropriate levels of homeostatic depression. Loss of such  
35 factors may disorient compensatory plasticity signals.

## 36 1 Introduction

37 Animal nervous systems use forms homeostatic synaptic plasticity to maintain stable function. Over  
38 the last 20-25 years, studies from diverse systems have revealed a wealth of information about how  
39 forms of homeostatic synaptic plasticity are implemented (Davis, 2013; Davis and Müller, 2015;  
40 Delvendahl and Müller, 2019; Marder and Goaillard, 2006; Pozo and Goda, 2010; Turrigiano, 2008).  
41 In particular, the *Drosophila melanogaster* neuromuscular junction (NMJ) has uncovered many facets  
42 of homeostatic implementation on a molecular level (Frank, 2014a; Frank et al., 2020). Much of the  
43 NMJ homeostasis work in both *Drosophila* and vertebrates has focused on a form of homeostatic plas-  
44 ticity termed presynaptic homeostatic potentiation (PHP). With PHP, manipulations that impair  
45 postsynaptic muscle receptor function trigger an increase in presynaptic vesicle release (Cull-Candy et  
46 al., 1980; Davis et al., 1998; Frank et al., 2006; Petersen et al., 1997; Wang et al., 2016).

47 Homeostatic plasticity the NMJ is a bi-directional process. First, PHP is reversible – when manipula-  
48 tions that impair muscle receptor function are removed, the presynaptic potentiation ceases (Wang et  
49 al., 2016; Yeates et al., 2017). Second, the *Drosophila* NMJ can depress quantal content in a homeo-  
50 static manner functionally opposite to PHP: Presynaptic homeostatic depression (PHD) happens when  
51 there is a decrease in quantal content in response to a perturbation causing an increase in quantal size.  
52 Experimentally, one way to trigger PHD is to overexpress the *Drosophila* vesicular glutamate trans-  
53 porter gene, *VGlut*, in motor neurons. Overexpression of the glutamate transporter leads to an increase  
54 in the diameter of glutamatergic vesicles, an increase in quantal size across the entire distribution of  
55 spontaneous miniature events, and very large spontaneous quantal events (Daniels, 2004). To compen-  
56 sate for this, quantal content at the NMJ is lowered, resulting in normal evoked postsynaptic excitation  
57 (Daniels et al., 2004).

58 Many genes have been shown to be necessary for PHP at the NMJ. But much less is known about PHD.  
59 PHP and PHD result in opposite changes in quantal content, and studies suggest divergent and separable  
60 mechanisms governing these forms of homeostatic plasticity. Some genes required for homeostatic  
61 potentiation are dispensable for homeostatic depression (Gaviño et al., 2015; Li et al., 2018; Marie et  
62 al., 2010). Moreover, unlike homeostatic potentiation, homeostatic depression does not appear to in-  
63 volve a change in the size of the readily releasable pool of synaptic vesicles. Rather, homeostatic de-  
64 pression appears to involve a decrease in release probability (Gaviño et al., 2015). Finally, PHP at the  
65 NMJ appears to be a process that is dependent the input (i.e. the type of synapse formed at the NMJ)  
66 while PHD does not appear to be input specific (Li et al., 2018).

67 The degree of overlap between homeostatic depression and homeostatic potentiation is unknown. We  
68 designed a small-scale, directed screen to test for links between these two forms of homeostatic plas-  
69 ticity. For the screen, we targeted genes based on prior evidence that their impairment in the neuron  
70 caused a failure of the long-term maintenance of PHP. We examined loss-of-function conditions for  
71 these genes in a VGlut overexpression background for PHD. We did not find any cases of failed ho-  
72 meostatic depression – the conditions we examined showed decreases in quantal content in response  
73 to increased quantal size. However, we did find an interesting and unexpected evoked neurotransmis-  
74 sion phenotype: a robust decrease in excitatory postsynaptic potential (EPSP) amplitude in a VGlut  
75 overexpression background because of a profound decrease in quantal content (QC). We observed this  
76 phenotype for a double heterozygous loss-of-function condition for the Ryanodine and IP<sub>3</sub> receptors.  
77 In our follow-up work, pharmacology phenocopied this genetic result, and our overall findings are  
78 consistent with the idea that the PHD system may show a heightened sensitivity to low calcium.

79 Prior characterizations of homeostatic depression did not report decreases in EPSP amplitude in VGlut  
80 overexpression relative to controls. Studies at the NMJ generally suggest models in which homeostatic  
81 compensation generally maintains evoked neurotransmission at the synapse approximately at control  
82 levels (Davis, 2013). Our results suggest that perturbation of calcium regulation may result in a defect  
83 in tuning homeostatic responses to maintain EPSPs at control levels.

## 84 2 Materials and Methods

### 85 *Drosophila* stocks and husbandry

86 Fruit fly stocks were obtained from the Bloomington *Drosophila* Stock Center (BDSC, Bloomington,  
87 Indiana), Kyoto Stock Center (DGRC, Kyoto, Japan), Japan National Institute of Genetics (Mishima,  
88 Shizuoka, Japan), Vienna *Drosophila* Research Center (VDRC, Vienna, Austria), or from the labs that  
89 generated them. *w*<sup>1118</sup> was used as a wild-type (WT) control (Hazelrigg et al., 1984). RNAi lines and  
90 mutants used in the screen are reported in Supplemental Table S1.

91 Fruit flies were raised on cornmeal, molasses, and yeast medium (see BDSC website for standard rec-  
92 ipe) in temperature-controlled conditions. Animals were reared at 25°C until they reached the wander-  
93 ing third instar larval stage, at which point they were selected for electrophysiological recording. *UAS-*  
94 *VGlut* (Daniels et al., 2004) was recombined with *OK371-GAL4* (Mahr and Aberle, 2006; Meyer and  
95 Aberle, 2006) to drive constitutive overexpression of VGlut. The full genotype of these animals is: *w*;  
96 *VGlut, OK371-Gal4/CyO-GFP*. Virgins of these flies were crossed to RNAi lines or mutants to test for  
97 changes to homeostatic depression. *w; OK371-Gal4/+* was used as a genetic control for baseline elec-  
98 trophysiology.

### 99 Electrophysiology and analysis

100 Larvae were dissected in a modified HL3 saline comprised of: NaCl (70 mM), KCl (5 mM), MgCl<sub>2</sub>  
101 (10 mM), NaHCO<sub>3</sub> (10 mM), sucrose (115 mM = 3.9%), trehalose (4.2 mM = 0.16%), HEPES (5.0  
102 mM = 0.12%), and CaCl<sub>2</sub> (0.5 mM, except as noted).

103 For pharmacology, Dantrolene (R&D Systems) and Xestospongine C (Abcam) were used. Dantrolene  
104 was mixed into saline to a final concentration of 25 μM. Larvae were cut open on the dorsal side and  
105 allowed to incubate in the Dantrolene saline for 5 minutes. The rest of the dissection and recording was  
106 completed in Dantrolene saline. Xestospongine C was applied in a similar manner, with the animals  
107 allowed to incubate in 20 μM Xestospongine C saline for 5 minutes before they were recorded, also in  
108 saline containing Xestospongine C.

109 Electrophysiological data were collected using an Axopatch 200B amplifier (Molecular Devices,  
110 Sunnyvale, CA) in bridge mode, digitized using a Digidata 1440A data acquisition system (Molecular  
111 Devices), and recorded with pCLAMP 10 acquisition software (Molecular Devices). A Master-8 pulse  
112 stimulator (A.M.P. Instruments, Jerusalem, Israel) and an ISO-Flex isolation unit (A.M.P. Instruments)  
113 were utilized to deliver 1 ms suprathreshold stimuli to the appropriate segmental nerve. The average  
114 spontaneous miniature excitatory postsynaptic potential (mEPSP) amplitude per NMJ was quantified  
115 by hand, approximately 100 individual spontaneous release events per NMJ (MiniAnalysis, Synapto-  
116 soft, Fort Lee, NJ). Measurements from all NMJs of a given condition were then averaged. For evoked  
117 neurotransmission, 30 excitatory postsynaptic potentials (EPSPs) were averaged to find a value for  
118 each NMJ. These were then averaged to calculate a value for each condition. Quantal content (QC)  
119 was calculated by the ratio of average EPSP and average mEPSP amplitudes for each individual NMJ.  
120 An average quantal content was then calculated for each condition. EPSP variability was assessed by  
121 measuring each of the 30 traces individually and calculating a standard deviation and range for that  
122 NMJ. Range was defined as the maximum EPSP value minus the minimum EPSP value.

### 123 Statistical Analyses

124 Statistical analyses were conducted using GraphPad Prism Software. Statistical significance was as-  
125 sessed either by Student's T-Test when one experimental data set was being directly compared to a  
126 control data set, or one-way ANOVA with Tukey's post-hoc test when multiple data sets were being  
127 compared. Specific *p* value ranges are noted in the Figure legends and shown in graphs as follows: \* *p*  
128 < 0.05, \*\* *p* < 0.01, and \*\*\* *p* < 0.001 (\* and # are used in Figures if there are additional comparisons  
129 highlighted). For some comparisons that are close to *p* < 0.05 statistical significance but do not achieve  
130 it (0.05 < *p* < 0.1), specific values are reported on the graph itself. Calcium cooperativity data were  
131 analyzed using a non-linear fit regression analysis on GraphPad Prism.

## 132 3 Results

### 133 *A recombinant line to analyze presynaptic homeostatic depression (PHD)*

134 Using previously published reagents, we generated a fly stock with constitutive *VGlut* transgene over-  
135 expression. Such a stock could be used as a tool for a single-cross genetic screen. To generate the stock,  
136 we recombined the *OK371-Gal4* motor neuron driver (Mahr and Aberle, 2006; Meyer and Aberle,  
137 2006) with a *UAS-VGlut* transgene (Daniels et al., 2004). We placed these two genetic elements in *cis*  
138 on *Drosophila melanogaster* Chromosome II. *OK371-Gal4* is an enhancer trap line for the *VGlut* pro-  
139 moter itself. This ensured that GAL4-driven *UAS-VGlut* overexpression would happen in desired tis-  
140 sues, *Drosophila* motor neurons.

141 We tested if the recombinant line constitutively overexpressing *UAS-VGlut* could express PHD at the  
142 NMJ. We crossed the recombinant stock to our wild-type stock (*w<sup>1118</sup>*, herein: WT) (Cross result,

143 herein: “*VGlut, OK371/+*”). By NMJ electrophysiology, we recorded from WT control, *OK371/+* con-  
144 trol, and *w; VGlut, OK371/+*. As expected, *VGlut, OK371/+* NMJs showed an increase in spontaneous  
145 miniature excitatory postsynaptic potential (mEPSP) amplitude compared to controls (Fig. 1A-C).  
146 Compared to WT control NMJs, there was no significant difference in evoked postsynaptic amplitudes  
147 for *VGlut, OK371/+* NMJs (Fig. 1D). This was because of an accurate homeostatic decrease in quantal  
148 content (QC) (Fig 1E) – hence, successful PHD. This result matched prior studies that had used WT as  
149 a control and a *trans OK371/UAS-VGlut* combination to induce PHD (Daniels et al., 2004; Gaviño et  
150 al., 2015; Li et al., 2018).

151 Even though PHD was successful relative to WT for our test cross, we noted a small, but statistically  
152 significant, baseline increase in the EPSP amplitude of *OK371/+* NMJs. This increase in *OK371/+*  
153 EPSP level was present compared either to WT control or to *VGlut, OK371/+* (Fig. 1D). One possibility  
154 is that the *OK371/+* genetic background has slightly elevated release, and the combined addition of  
155 *UAS-VGlut* reveals a slight depression in evoked amplitude. Noting this potentially important differ-  
156 ence in our driver control, we continued using the *OK371/+* heterozygous condition as a genetic back-  
157 ground control. *OK371/+* is a closer genetic control for PHD analysis than WT.

### 158 ***A genetic screen suggests a role for calcium stores in homeostatic depression***

159 We used our recombinant line to conduct a genetic screen for conditions that affect presynaptic home-  
160 static depression (PHD). We crossed the recombinant stock to *UAS-RNAi* stocks and we selected lar-  
161 vae for recording (Materials and Methods, Fig. 2A). For the screen, we targeted a subset of genes  
162 previously identified as in the neuron for homeostatic potentiation, or closely related genes. We tested  
163 43 genotypes (sometimes multiple conditions for a single gene), including our homeostatic depression  
164 condition, *VGlut, OK371/+* (Fig. 2B, C).

165 The aggregate results of the screen are reported here (Fig. 2B, C; raw data in Supplementary Table S1).  
166 We recorded from 42 experimental heterozygous *mutant/+* or *> UAS-RNAi/+* conditions, in the *VGlut,*  
167 *OK371/+* genetic background. Of those 42, 12 achieved EPSPs that were numerically larger than  
168 *VGlut, OK371/+*, and 22 achieved QCs that were numerically larger than *VGlut, OK371/+* (Fig. 2B,  
169 C). Increased evoked potentials could signify failed PHP – however, none of these cases represented  
170 statistically significant increases compared to *VGlut, OK371/+*. None were so much bigger than they  
171 were good candidates for “failed PHD.” Indeed, all of the candidates had average EPSP and QC levels  
172 below *OK371/+* NMJ baseline recordings (Compare Figs 1D, E and Fig. 2B, C).

173 We noted a phenotype distinct from what we were initially seeking: two crosses yielded larvae with  
174 striking decreases in NMJ EPSP amplitudes, more than two standard deviations below the average  
175 EPSPs from the baseline *VGlut, OK371/+* data set (Fig. 2B). One case was knockdown of the *Survival*  
176 *motor neuron (Smn)* gene with the *UAS-Smn[RNAi]<sup>JF02057</sup>* line in the *VGlut, OK371/+* background.  
177 This was intriguing because *Drosophila Smn* is homologous to human *SMN*. Defects in *SMN* cause  
178 Spinal Muscular Atrophy (Lefebvre et al., 1995). *Drosophila Smn* has been characterized as a potential  
179 model for Spinal Muscular Atrophy (Raimer et al., 2020; Sen et al., 2011; Spring et al., 2019). *Smn*  
180 has also previously been implicated in PHP (Sen et al., 2011). However, the result for *UAS-*  
181 *Smn[RNAi]<sup>JF02057</sup>* was not replicated by other *Smn* knockdown or loss-of-function mutant test crosses  
182 (Fig. 2B, C). We did not follow up on *Smn* for this study.

183 A second case with a striking decrease in EPSP amplitude in the screen was a double heterozygous  
184 genetic condition in genes encoding the *Drosophila* Ryanodine receptor (*RyR*) and inositol 1,4,5-  
185 trisphosphate (IP<sub>3</sub>) receptor (*itpr*): *VGlut, OK371/RyR<sup>E4340K</sup>; itpr<sup>90B/+</sup>* (Fig. 2B, C). Ryanodine recep-  
186 tors (RyRs) and IP<sub>3</sub> receptors (IP<sub>3</sub>Rs) are localized to the endoplasmic reticulum. They mediate release  
187 of calcium from intracellular stores (Berridge, 1984, 1987, 1998; Simkus and Stricker, 2002). The



188 *RyR<sup>E4340K</sup>* mutation is a single amino acid substitution (glutamic acid to lysine) (Dockendorff et al.,  
189 2000), and the *itpr<sup>90B</sup>* mutation is null mutant generated by imprecise excision of a transposon  
190 (Venkatesh and Hasan, 1997). We previously defined a roles for RyR, IP<sub>3</sub>R, IP<sub>3</sub> signaling and upstream  
191 components in maintaining presynaptic homeostatic potentiation (PHP) (Brusich et al., 2015; James et  
192 al., 2019).

193 In parallel, we screened single mutant manipulations for both genes. Neither the *RyR<sup>E4340K/+</sup>* heterozy-  
194 gous condition, nor the *itpr<sup>90B/+</sup>* heterozygous condition – nor had any other single heterozygous or  
195 RNAi knockdown conditions in either gene – yielded as significantly depressed EPSPs in response to  
196 PHD challenge (Fig. 2B, C). Therefore, the screen result with the double heterozygote could be due to  
197 a genetic interaction, or it could be due to other factors in the genetic background. This preliminary  
198 finding required further characterization.

199 We tested if the electrophysiological phenotype could be due to a baseline neurotransmission defect  
200 when both genes are heterozygous. By electrophysiology, we compared NMJs from *OK371/RyR<sup>E4340K</sup>*,  
201 *itpr<sup>90B/+</sup>* larvae as a baseline double heterozygous condition vs. NMJs from *VGlut, OK371/RyR<sup>E4340K</sup>*,  
202 *itpr<sup>90B/+</sup>* larvae (Fig. 3A-D). Just like WT, the baseline double heterozygous condition did have a slight  
203 decrease in EPSP amplitude compared to *OK371/+* driver control (Fig. 3A). This indicated a small,  
204 but discernible defect in neurotransmission in animals where the IP<sub>3</sub>Rs and RyRs are both impaired.  
205 Yet the double heterozygous condition with concurrent *VGlut* gene overexpression showed a lot of  
206 depression compared to its own genetic control – increased quantal size (Fig. 3B), but markedly de-  
207 creased evoked amplitude (Fig. 3C) because of a large decrease in quantal content (Fig. 3D), hence  
208 “excess” PHD.

209 We noted that the EPSP amplitude in individual *VGlut, OK371/RyR<sup>E4340K</sup>; itpr<sup>90B/+</sup>* NMJ recordings  
210 appeared to vary markedly from stimulus to stimulus. High variability could indicate unstable neuronal  
211 excitability or release. To check if evoked release events were indeed more variable, we completed two  
212 additional analyses. First, we extracted the amplitude of each individual EPSP event at every NMJ  
213 recorded. From this information, we calculated the EPSP standard deviation (S.D.) per individual NMJ.  
214 We also calculated a range for each NMJ by subtracting the maximum EPSP of the thirty from the  
215 minimum. We averaged these S.D. and range measures for each genotype, considering all of the indi-  
216 vidual EPSP recordings.

217 For both of these EPSP variability parameters, *w; VGlut, OK371/RyR<sup>E4340K</sup>; itpr<sup>90B/+</sup>* animals showed  
218 statistically significant higher standard deviations and ranges compared to controls (Fig. 3E). By con-  
219 trast, double heterozygous baseline *OK371/RyR<sup>E4340K</sup>; itpr<sup>90B/+</sup>* NMJs did not differ significantly from  
220 *w; OK371/+* driver control NMJs, suggesting that the variability stems from *VGlut* overexpression in  
221 the mutant background (Fig. 3E). *w; VGlut, OK371/+* NMJs showed numerically higher variability  
222 than *w; OK371/+*, but this was not statistically significant (Fig. 3E).

223

### 224 ***Pharmacology targeting Ryanodine and IP<sub>3</sub> receptors recapitulates loss-of-function genetics***

225 We tested if the electrophysiological phenotypes we observed genetically could be recapitulated by  
226 combining genetics and pharmacology. We started with the drug Dantrolene. Dantrolene is a RyR an-  
227 tagonist (Vazquez-Martinez et al., 2003; Zhao et al., 2001). In prior work at the *Drosophila* NMJ, we  
228 found that application of Dantrolene can abrogate the long-term maintenance of PHP (James et al.,  
229 2019).

230 For our first test with Dantrolene, we used a sensitized *OK371/+; itpr<sup>90B/+</sup>* genetic background. With  
231 this background, we could pharmacologically impair RyRs while genetically impairing IP<sub>3</sub>Rs. We ap-  
232 plied 25μM of Dantrolene to: 1) *OK371/+* NMJs; 2) *VGlut, OK371/+* NMJs; 3) *OK371/+; itpr<sup>90B/+</sup>*

233 NMJs; and 4) *VGlut, OK371/+; itpr<sup>90B/+</sup>* NMJs. The mEPSP amplitudes in both *VGlut*-overexpressing  
234 lines were elevated compared to their respective controls (Fig. 4A). This indicated that in the presence  
235 of Dantrolene, there was still homeostatic pressure that could induce PHD. EPSP amplitudes in both  
236 *VGlut*-overexpressing lines were significantly decreased compared to their respective genetic controls  
237 (Fig. 4B). This was because of a marked decrease in QC (Fig. 4A). Moreover, the *VGlut, OK371/+;*  
238 *itpr<sup>90B/+</sup>* condition with Dantrolene had significantly decreased evoked transmission compared to  
239 *VGlut, OK371/+* with Dantrolene (Fig. 4A, B). This indicated a cumulative effect of impairing both  
240 the IP<sub>3</sub>R and RyRs in a PHD-challenged background.

241 It is possible that strong impairment of RyRs was sufficient to disorient the PHD regulation system.  
242 We ran additional pharmaco-genetic tests with Dantrolene, this time using a second sensitized genetic  
243 background, *OK371/RyR<sup>E4340K</sup>* – with and without a *UAS-VGlut* overexpression. Again, mEPSPs were  
244 evoked potentials became significantly larger when *VGlut* was overexpressed (Fig. 5A, left), but EPSPs  
245 were significantly down (Fig. 5A, middle) because of a marked decrease in quantal content (Fig. 5A,  
246 right).

247 Finally, we attempted the inverse pharmaco-genetic experiment from that in Figure 4. This time we  
248 used the IP<sub>3</sub>R inhibitor, Xestospongine C (Gafni et al., 1997; Wilcox et al., 1998) and the sensitized  
249 *OK371/RyR<sup>E4340K</sup>* genetic background. We applied 20 μM Xestospongine C, both to *OK371/RyR<sup>E4340K</sup>*  
250 NMJs and to *VGlut, OK371/RyR<sup>E4340K</sup>* NMJs. The mEPSPs were numerically larger when *VGlut* was  
251 overexpressed (Fig. 5B, left) – though this time, for the Xestospongine C dataset, the data did not achieve  
252 statistical significance for mEPSP size ( $p = 0.10$ ). This could indicate weak homeostatic pressure in the  
253 presence of Xestospongine C. Nevertheless, EPSPs were significantly down (Fig. 5B, middle) because  
254 of a marked decrease in quantal content (Fig. 5B, right).

255 Taking our data together, for each case where we examined a dual impairment of RyR and IP<sub>3</sub>R the  
256 EPSP amplitudes and QC were all quite low with concomitant *VGlut* overexpression (Figs. 3-5). These  
257 results are consistent with excess depression.

258

### 259 ***Excess PHD in very low extracellular calcium***

260 We wondered how impairment of channels that mediate release of calcium from intracellular stores  
261 might cause the electrophysiological phenotypes that we observed. Our prior work suggested that these  
262 ER calcium store channels and the signaling systems that control them are required to maintain home-  
263 ostatic potentiation throughout life (Brusich et al., 2015; James et al., 2019). We also found a related  
264 result: impairing Ca<sup>2+</sup> store release mollified hyperexcitability phenotypes caused by gain-of-function  
265 Cav2 amino-acid substitutions in the alpha1 subunit Cacophony. Cav2 channels mediate synaptic cal-  
266 cium influx at the NMJ (Brusich et al., 2018). In light of these prior data, we considered two possibil-  
267 ities for PHD. One model is that the IP<sub>3</sub>R and RyR channels play a role in orienting PHD and ensuring  
268 a proper level of depression. A different model is that calcium itself plays the important role. If this  
269 latter idea were true, it might be the case that lowering calcium influx into the synaptic cleft would also  
270 be sufficient to disorient the PHD system, resulting in excess depression.

271 As a test, we measured release over a range of low extracellular calcium concentrations (0.2-0.5 mM).  
272 We examined six genotypes: 1) WT; 2) *w; OK371/+*; 3) *w; VGlut, OK371/+*; 4) *w; RyR<sup>E4340K/+</sup>;*  
273 *itpr<sup>90B/+</sup>*; 5) *w; OK371/RyR<sup>E4340K</sup> ; itpr<sup>90B/+</sup>*; and 6) *w; VGlut, OK371/RyR<sup>E4340K</sup> ; itpr<sup>90B/+</sup>*. To organ-  
274 ize data and to calculate calcium cooperativity, we plotted quantal content as a function of calcium  
275 concentration, with the x-y axes on a log-log scale (Fig. 6A, B). To account for different Ca<sup>2+</sup> driving

276 forces in the different concentrations, we corrected QC for nonlinear summation in our plots and in our  
277 subsequent analyses (NLS Corrected QC) (Martin, 1955).

278 Non-linear regression analyses revealed that there was not a significant difference in calcium cooper-  
279 ativity between any of these genotypes over the range of extracellular  $[Ca^{2+}]$  we tested (Fig. 6A, B).  
280 The calculated log-log slope values of the control PHD genotypes were: WT (log-log slope = 1.810),  
281  $w$ ;  $OK371/+$  (log-log slope = 1.884), and  $w$ ;  $VGlut, OK371/+$  (log-log slope = 2.117). Comparing those  
282 three slopes with one another by nonlinear regression yielded no significant difference in slope ( $p =$   
283 0.91). The log-log slope values of the double heterozygous conditions were:  $w$ ;  $RyR^{E4340K/+}$ ;  $itpr^{90B/+}$   
284 (log-log slope = 1.737),  $w$ ;  $OK371/RyR^{E4340K}$ ;  $itpr^{90B/+}$  (log-log slope = 2.102), and  $w$ ;  $VGlut,$   
285  $OK371/RyR^{E4340K}$ ;  $itpr^{90B/+}$  (log-log slope = 1.601). Comparing those slopes with one another also  
286 yielded no significant difference ( $p = 0.77$ ).

287 Even though there was no significant difference in calcium cooperativity of release over the range of  
288 low  $[Ca^{2+}]$  conditions examined, our data did show a very large drop in release between 0.3 and 0.2  
289 mM  $[Ca^{2+}]$  – specifically for the genotypes where PHD was induced by  $UAS-VGlut$  overexpression, or  
290 for the genotypes with a double heterozygous impairment of  $RyR$  and  $itpr$ . Examining the raw data at  
291 0.2 mM  $[Ca^{2+}]$ , we observed that there was significant homeostatic pressure for PHD signified by  
292 mEPSP amplitude increases in the  $VGlut$ -overexpression background (Fig. 6C, left). Yet except for the  
293 control NMJs, EPSP amplitudes were very much diminished (Fig. 6C, middle) because of stark drops  
294 in QC (Fig. 6C, right).

295 Together, the data point to two conclusions. First, low extracellular calcium on its own appears to be a  
296 case where the synapse experiences “excess” PHD (Fig. 6C,  $VGlut, OK371/+$  data). Second, double  
297 heterozygous impairment of  $RyR$  and  $itpr$  appears to cause very low levels of baseline release in low  
298 calcium, irrespective of PHD challenge (Fig. 6C, middle; compare with Fig. 3C). Taken together, these  
299 data suggest that lowering presynaptic calcium by any means (impairing store release and/or impairing  
300 influx) is sufficient to disorient the homeostatic set point for release.

### 301 **Excess PHD with impaired *Cav2* function**

302 As a final test of the idea depressed presynaptic calcium causes excess PHD, we turned to genetics.  
303 *Drosophila Cav2* channels mediate synaptic calcium influx at the NMJ. We used a hypomorphic mutant  
304 in the *Cav2* alpha1 subunit-encoding *cacophony* gene, *cac<sup>S</sup>*, to limit calcium influx. *Cav2* is essential  
305 for viability, but *cac<sup>S</sup>* hypomorphs are viable and fertile (Kawasaki et al., 2000; Smith et al., 1998).  
306 Prior work showed that the *cac<sup>S</sup>* homozygous condition dampens NMJ EPSP amplitude by about 70-  
307 80% (Frank et al., 2006); calcium imaging data suggest this is due to a ~50% decrease in  $Ca^{2+}$  influx  
308 during evoked stimulation (Müller and Davis, 2012). Beyond this phenotype in baseline neurotrans-  
309 mission, *cac<sup>S</sup>* hypomorphs also block PHP expression and PHP-associated increases in presynaptic  
310 calcium influx (Frank et al., 2006; Müller and Davis, 2012).

311 With a single cross, we generated hemizygous *cac<sup>S</sup>/Y*;  $VGlut, OK371/+$  male larvae (Fig. 7A). Com-  
312 pared to *cac<sup>S</sup>/Y* as a baseline mutant control, *cac<sup>S</sup>/Y*;  $VGlut, OK371/+$  NMJs have a marked increase in  
313 mEPSP size (Fig. 7B), indicating homeostatic pressure to induce PHD (Fig. 7B). However, comparing  
314 evoked potentials of those two conditions shows that *cac<sup>S</sup>/Y*;  $VGlut, OK371/+$  NMJs have much  
315 smaller EPSPs (Fig. 7C). This was because of an extreme decrease in QC (Fig. 7D) – or “excess” PHD.

316

## 317 **4 Discussion**

318 We began this study in search of genetic conditions that affect PHD (Fig. 2). While we did not find any  
319 conditions that result in a block of PHD, we did find conditions that disrupt the tuning of PHD and



320 provide insight into the role calcium regulation plays in this form of homeostatic plasticity. When IP<sub>3</sub>R  
321 and RyR functions are partially impaired – either by genetics or by pharmacology – the NMJ still  
322 executes a PHD-like process. But that process goes beyond what is appropriate for the homeostatic  
323 pressure that is applied to the system. As a result, evoked potentials at the NMJ are much smaller than  
324 baseline (Figs. 3-5). A similar “excess depression” phenotype is observed when extracellular [Ca<sup>2+</sup>] is  
325 lowered to 0.2 mM (Fig. 6) and when the Cav2 alpha1 subunit gene *cacophony* harbors a hypomorphic  
326 mutation, *cac<sup>S</sup>* (Fig. 7).

327 This phenotype has important implications for proper homeostatic control of synapse function. Taking  
328 our data together, we propose that presynaptic calcium plays an important role in tuning PHD to the  
329 appropriate level. Perturbations that dampen calcium efflux from stores or perturbations that dampen  
330 calcium influx from the extracellular environment can both disrupt PHD tuning (Fig. 8).

331

### 332 **Known roles for calcium in tuning homeostatic plasticity**

333 The notion that calcium plays a role in homeostatic signaling is not new. Many roles for voltage-gated  
334 calcium channels in synaptic homeostasis are well-documented (Frank, 2014a, b). Prior to our study,  
335 there was evidence for voltage-gated calcium channel regulation for both NMJ PHP and PHD. For  
336 PHP, loss-of-function conditions in *Cav2/cacophony* can impair or block this form of homeostatic reg-  
337 ulation (Frank et al., 2006; Frank et al., 2009; Müller and Davis, 2012; Spring et al., 2016). Calcium  
338 imaging experiments suggest that the reason is because an increase in calcium influx through Cav<sub>2</sub> is  
339 required for the upregulation of quantal content during PHP, and mutant conditions like *cac<sup>S</sup>* block this  
340 increase (Müller and Davis, 2012). Recent studies report that Cacophony and other active zone protein  
341 levels increase at the NMJ active zone in response to PHP homeostatic challenges (Böhme et al., 2019;  
342 Goel et al., 2019; Gratz et al., 2019). And work from mammalian systems mirrors these findings. For  
343 example, with mouse hippocampal cultures, TTX exposure induces a homeostatic decrease in presyn-  
344 aptic calcium influx (Zhao et al., 2011).

345 The converse appears true for PHD. Calcium imaging data from two different studies has shown a  
346 decrease in the size of calcium transients at the NMJ in response to presynaptic nerve firing in VGlut-  
347 overexpressing animals (Gaviño et al., 2015; Li et al., 2018). The data are mixed on how these de-  
348 creased transients might come about during PHD. Using a tagged *UAS-cacophony* cDNA transgene,  
349 two studies verified there was a reduction in the amount GFP-tagged Cacophony alpha1 subunits in  
350 Cav<sub>2</sub> in a VGlut-overexpressing background (Gaviño et al., 2015; Gratz et al., 2019) However, one of  
351 these same studies demonstrated that if a tagged genomic construct is used instead, that same Cav<sub>2</sub>  
352 reduction is not observed (Gratz et al., 2019). Since the transgenic tagged Cacophony-GFP is the prod-  
353 uct of a single *cac* splice isoform (Kawasaki et al., 2002; Kawasaki et al., 2004), it could be the case  
354 that some isoforms are more dynamically trafficked at the synapse. Another possibility is that existing  
355 active zone components are somehow modulated during PHD. Regardless of the actual mechanism,  
356 the phenomenon appears conserved: again, with rodent hippocampal preparations, increased neuronal  
357 activity through gabazine exposure induces a PHD-like phenomenon ultimately resulting in decreases  
358 in calcium influx and release (Jeans et al., 2017; Zhao et al., 2011).

359

### 360 **Similarities and differences with prior PHD studies at the NMJ**

361 We were able to conduct a PHD screen using our recombinant stock with the *UAS-VGlut* and *OK371-*  
362 *Gal4* elements on the same chromosome. We acknowledge that this type of *cis* strain construction is  
363 an unorthodox choice for *Drosophila* genetics. This is because *UAS-VGlut* is continually overexpressed

364 every generation. In principle, such a stock can pick up modifier mutations. The trade-off for our work  
365 was a simplified, single-generation crossing scheme for genetic screens. As it turns out, our recombi-  
366 nant stock with the driver and *UAS* elements in *cis* maintains consistent PHD challenge from generation  
367 to generation, and it behaves similarly electrophysiologically to *trans OK371/VGlut* combinations used  
368 in other studies (Daniels et al., 2004; Gaviño et al., 2015; Li et al., 2018).

369 There are differences between our study and the findings of other published work. Prior studies have  
370 used WT (or *w<sup>1118</sup>*) as a control background when compared to VGlut overexpression (Daniels et al.,  
371 2004; Gaviño et al., 2015; Li et al., 2018). This is a standard practice. Those studies reported precise  
372 PHD when comparing WT vs. *OK371/VGlut* third instar larvae – decreased QC at *OK371/VGlut* NMJs  
373 resulting in unchanged evoked transmission. We replicated this finding (Fig. 1). However, we also used  
374 our Gal4 driver stock background *OK371/+* as an additional control. For that comparison, we saw a  
375 slight depression in the evoked amplitude of *OK371, VGlut/+* NMJs (Fig. 1). One possibility is that  
376 our recombinant stock was acting as a sensitized background to uncover conditions that might cause  
377 excess depression.

378 A second difference comes from the low extracellular calcium test. A low extracellular calcium exper-  
379 iment was previously done when VGlut overexpression was first characterized (Daniels et al., 2004).  
380 For that study, the authors showed that QC was significantly diminished compared to wild-type NMJs  
381 by the method of failure analysis. Taking the data of that study in aggregate, the authors concluded that  
382 PHD was intact in a variety of conditions, including saline with very low extracellular  $[Ca^{2+}]$  (0.23 mM  
383  $Ca^{2+}$ , 20 mM  $Mg^{2+}$ ). Our study may appear to conflict with that study because we found that saline  
384 with very low  $[Ca^{2+}]$  (0.2 mM  $Ca^{2+}$ , 10mM  $Mg^{2+}$ ) is conducive to “excess PHD.” One possibility is  
385 that since the original study was examining failure percentage vs. WT – and not the absolute value of  
386 mEPSPs or EPSPs in low calcium – a finding like excess depression might not be as easily observed.  
387 Other differences might be attributed genetic background or other differences in recording saline, like  
388 magnesium concentration.

389 Finally, one other study previously examined the effects of a *cac<sup>S</sup>* mutation with concomitant VGlut  
390 overexpression (Gaviño et al., 2015). The authors did not find the low evoked potentials that we report.  
391 The major difference between that experiment and ours is that the prior work examined the *cac<sup>S</sup>* mu-  
392 tation in an extracellular  $[Ca^{2+}]$  (1.0 mM) that was double that of our study. The result was a  $Ca^{2+}$   
393 driving force that yielded robust baseline EPSPs, even in the *cac<sup>S</sup>* mutant background (Gaviño et al.,  
394 2015). Given our results with calcium concentration (Fig. 6), a similar effect may work to resolve any  
395 sort of tuning problem with PHD compensation that we uncovered here.

### 396 **How do calcium stores tune PHD?**

397 How exactly might calcium stores impact PHD tuning? Less is understood about this. We know that  
398 endoplasmic reticulum (ER) can be visualized at *Drosophila* NMJ terminals (Summerville et al., 2016),  
399 and recently developed imaging tools can show how nerve stimulation results in dynamic changes to  
400 ER luminal calcium, including at the *Drosophila* NMJ (de Juan-Sanz et al., 2017; Handler et al., 2019;  
401 Oliva et al., 2020). In parallel, other groups working at the NMJ have demonstrated important roles in  
402 baseline neurotransmission and in PHP for ER resident proteins (Genç et al., 2017; Kikuma et al.,  
403 2017). And from our prior work at the NMJ, we know that store calcium channels and upstream sig-  
404 naling components are important for maintaining the NMJ’s capacity for PHP throughout life (Brusich  
405 et al., 2015; James et al., 2019). We also know that disrupting these same factors can ameliorate hy-  
406 perexcitability associated with gains of  $Ca_v2$  function (Brusich et al., 2018). Finally, from mammalian  
407 work it is clear that  $IP_3Rs$ ,  $RyRs$ , and intracellular calcium govern a variety of forms of neuroplasticity  
408 (Berridge, 2016), including paired pulse facilitation (Emptage et al., 2001), and modulation of voltage-  
409 gated calcium channel activity (Catterall, 2011; Lee et al., 2000).

410 If PHD were simply a matter of properly functioning neurotransmission machinery, then it is not en-  
411 tirely obvious why PHD would be so sensitive to the amount calcium available such that its tuning  
412 point would become disoriented, either when store-operated channels were impaired or when the  
413 amount of influx was lowered. In our study, neurotransmission has not been lowered beyond a point of  
414 synapse failure. This means that there is still functional machinery. And PHD, per se, is not disrupted  
415 – indeed, there is still depression. With any type of homeostatic system, there not only needs to be error  
416 detection (large quantal size) and correction (decreased quantal content), but there also need to be  
417 brakes applied to the system to prevent some kind of overcorrection. Our data suggest some manner of  
418 PHD “overcorrection.” In our view, this is an interesting and understudied type of phenomenon that  
419 could be examined in other homeostatic systems as well.

420 So how exactly do levels of calcium (or the function of distinct types of calcium channels found at the  
421 synapse) ultimately affect PHD correction levels? This is a difficult problem. The first step might be  
422 to narrow the relevant tissue type(s) involved in PHD signaling. ER and store-operated channels are  
423 relevant to the functions of many tissues. In principle, our genetic loss-of-function manipulations to  
424 *itpr* and *RyR* could affect store-operated channels either in the neuron or in the muscle or in surrounding  
425 tissues like glia. Our pharmacological manipulations using Dantrolene and Xestospongine C could also  
426 affect multiple tissue types. Therefore, in principle, changing the levels of cytosolic calcium could  
427 either affect local signaling in the neuron, or it could result in aberrant signaling back to the presynaptic  
428 neuron, disorienting the homeostat.

429 We favor the idea that the relevant calcium signal is local in the motor neuron for two reasons. First,  
430 from our own data, we were able to observe the excess depression (or overcorrection) phenotype either  
431 with manipulations to store calcium or with manipulations that affect presynaptic calcium influx, in-  
432 cluding partial loss-of-function of neuronal *cacophony*. Second, a recent study puts forth data suggest-  
433 ing that when VGlut overexpression induces PHD, this happens exclusively because of excess presyn-  
434 aptic glutamate release, and presynaptic depression is initiated independent of any sort of postsynaptic  
435 response (Li et al., 2018). Such an autocrine signaling mechanism could very well reveal a role for  
436 intracellular calcium signaling in the presynapse.

## 437 **5 References**

- 438 Berridge, M.J. (1984). Inositol trisphosphate and diacylglycerol as second messengers. *Biochem J* 220,  
439 345-360.
- 440 Berridge, M.J. (1987). Inositol trisphosphate and diacylglycerol: two interacting second messengers.  
441 *Annu Rev Biochem* 56, 159-193.
- 442 Berridge, M.J. (1998). Neuronal calcium signaling. *Neuron* 21, 13-26.
- 443 Berridge, M.J. (2016). The Inositol Trisphosphate/Calcium Signaling Pathway in Health and Disease.  
444 *Physiol Rev* 96, 1261-1296.
- 445 Böhme, M.A., McCarthy, A.W., Grasskamp, A.T., Beuschel, C.B., Goel, P., Jusyte, M., Laber, D.,  
446 Huang, S., Rey, U., Petzoldt, A.G., *et al.* (2019). Rapid active zone remodeling consolidates  
447 presynaptic potentiation. *Nat Commun* 10, 1085.
- 448 Brusich, D.J., Spring, A.M., and Frank, C.A. (2015). A single-cross, RNA interference-based genetic  
449 tool for examining the long-term maintenance of homeostatic plasticity. *Frontiers in cellular*  
450 *neuroscience* 9, 107.

- 451 Brusich, D.J., Spring, A.M., James, T.D., Yeates, C.J., Helms, T.H., and Frank, C.A. (2018).  
452 Drosophila CaV2 channels harboring human migraine mutations cause synapse hyperexcitability that  
453 can be suppressed by inhibition of a Ca<sup>2+</sup> store release pathway. *PLoS genetics* *14*, e1007577.
- 454 Catterall, W.A. (2011). Voltage-gated calcium channels. *Cold Spring Harbor perspectives in biology*  
455 *3*, a003947.
- 456 Cull-Candy, S.G., Miledi, R., Trautmann, A., and Uchitel, O.D. (1980). On the release of transmitter  
457 at normal, myasthenia gravis and myasthenic syndrome affected human end-plates. *J Physiol* *299*, 621-  
458 638.
- 459 Daniels, R.W., Collins, C.A., Gelfand, M.V., Dant, J., Brooks, E.S., Krantz, D.E., and DiAntonio, A.  
460 (2004). Increased expression of the Drosophila vesicular glutamate transporter leads to excess  
461 glutamate release and a compensatory decrease in quantal content. *J Neurosci* *24*, 10466-10474.
- 462 Davis, G.W. (2013). Homeostatic signaling and the stabilization of neural function. *Neuron* *80*, 718-  
463 728.
- 464 Davis, G.W., DiAntonio, A., Petersen, S.A., and Goodman, C.S. (1998). Postsynaptic PKA controls  
465 quantal size and reveals a retrograde signal that regulates presynaptic transmitter release in Drosophila.  
466 *Neuron* *20*, 305-315.
- 467 Davis, G.W., and Müller, M. (2015). Homeostatic control of presynaptic neurotransmitter release.  
468 *Annu Rev Physiol* *77*, 251-270.
- 469 de Juan-Sanz, J., Holt, G.T., Schreiter, E.R., de Juan, F., Kim, D.S., and Ryan, T.A. (2017). Axonal  
470 Endoplasmic Reticulum Ca(2+) Content Controls Release Probability in CNS Nerve Terminals.  
471 *Neuron* *93*, 867-881 e866.
- 472 Delvendahl, I., and Müller, M. (2019). Homeostatic plasticity-a presynaptic perspective. *Curr Opin*  
473 *Neurobiol* *54*, 155-162.
- 474 Dockendorff, T.C., Robertson, S.E., Faulkner, D.L., and Jongens, T.A. (2000). Genetic  
475 characterization of the 44D-45B region of the Drosophila melanogaster genome based on an F2 lethal  
476 screen. *Molecular & general genetics : MGG* *263*, 137-143.
- 477 Emptage, N.J., Reid, C.A., and Fine, A. (2001). Calcium stores in hippocampal synaptic boutons  
478 mediate short-term plasticity, store-operated Ca<sup>2+</sup> entry, and spontaneous transmitter release. *Neuron*  
479 *29*, 197-208.
- 480 Frank, C.A. (2014a). Homeostatic plasticity at the Drosophila neuromuscular junction.  
481 *Neuropharmacology* *78*, 63-74.
- 482 Frank, C.A. (2014b). How voltage-gated calcium channels gate forms of homeostatic synaptic  
483 plasticity. *Frontiers in cellular neuroscience* *8*, 40.
- 484 Frank, C.A., James, T.D., and Muller, M. (2020). Homeostatic control of Drosophila neuromuscular  
485 junction function. *Synapse* *74*, e22133.
- 486 Frank, C.A., Kennedy, M.J., Goold, C.P., Marek, K.W., and Davis, G.W. (2006). Mechanisms  
487 underlying the rapid induction and sustained expression of synaptic homeostasis. *Neuron* *52*, 663-677.
- 488 Frank, C.A., Pielage, J., and Davis, G.W. (2009). A presynaptic homeostatic signaling system  
489 composed of the Eph receptor, ephexin, Cdc42, and CaV2.1 calcium channels. *Neuron* *61*, 556-569.
- 490 Gafni, J., Munsch, J.A., Lam, T.H., Catlin, M.C., Costa, L.G., Molinski, T.F., and Pessah, I.N. (1997).  
491 Xestospongins: potent membrane permeable blockers of the inositol 1,4,5-trisphosphate receptor.  
492 *Neuron* *19*, 723-733.



- 493 Gaviño, M.A., Ford, K.J., Archila, S., and Davis, G.W. (2015). Homeostatic synaptic depression is  
494 achieved through a regulated decrease in presynaptic calcium channel abundance. *eLife* 4.
- 495 Genç, Ö., Dickman, D.K., Ma, W., Tong, A., Fetter, R.D., and Davis, G.W. (2017). MCTP is an ER-  
496 resident calcium sensor that stabilizes synaptic transmission and homeostatic plasticity. *eLife* 6.
- 497 Goel, P., Dufour Bergeron, D., Bohme, M.A., Nunnally, L., Lehmann, M., Buser, C., Walter, A.M.,  
498 Sigrist, S.J., and Dickman, D. (2019). Homeostatic scaling of active zone scaffolds maintains global  
499 synaptic strength. *J Cell Biol* 218, 1706-1724.
- 500 Gratz, S.J., Goel, P., Bruckner, J.J., Hernandez, R.X., Khateeb, K., Macleod, G.T., Dickman, D., and  
501 O'Connor-Giles, K.M. (2019). Endogenous Tagging Reveals Differential Regulation of Ca(2+)  
502 Channels at Single Active Zones during Presynaptic Homeostatic Potentiation and Depression. *J*  
503 *Neurosci* 39, 2416-2429.
- 504 Handler, A., Graham, T.G.W., Cohn, R., Morante, I., Siliciano, A.F., Zeng, J., Li, Y., and Ruta, V.  
505 (2019). Distinct Dopamine Receptor Pathways Underlie the Temporal Sensitivity of Associative  
506 Learning. *Cell* 178, 60-75 e19.
- 507 Hazelrigg, T., Levis, R., and Rubin, G.M. (1984). Transformation of white locus DNA in drosophila:  
508 dosage compensation, zeste interaction, and position effects. *Cell* 36, 469-481.
- 509 James, T.D., Zwiefelhofer, D.J., and Frank, C.A. (2019). Maintenance of homeostatic plasticity at the  
510 *Drosophila* neuromuscular synapse requires continuous IP3-directed signaling. *eLife* 8.
- 511 Jeans, A.F., van Heusden, F.C., Al-Mubarak, B., Padamsey, Z., and Emptage, N.J. (2017). Homeostatic  
512 Presynaptic Plasticity Is Specifically Regulated by P/Q-type Ca(2+) Channels at Mammalian  
513 Hippocampal Synapses. *Cell reports* 21, 341-350.
- 514 Kawasaki, F., Collins, S.C., and Ordway, R.W. (2002). Synaptic calcium-channel function in  
515 *Drosophila*: analysis and transformation rescue of temperature-sensitive paralytic and lethal mutations  
516 of cacophony. *J Neurosci* 22, 5856-5864.
- 517 Kawasaki, F., Felling, R., and Ordway, R.W. (2000). A temperature-sensitive paralytic mutant defines  
518 a primary synaptic calcium channel in *Drosophila*. *J Neurosci* 20, 4885-4889.
- 519 Kawasaki, F., Zou, B., Xu, X., and Ordway, R.W. (2004). Active zone localization of presynaptic  
520 calcium channels encoded by the cacophony locus of *Drosophila*. *J Neurosci* 24, 282-285.
- 521 Kikuma, K., Li, X., Kim, D., Sutter, D., and Dickman, D.K. (2017). Extended Synaptotagmin Localizes  
522 to Presynaptic ER and Promotes Neurotransmission and Synaptic Growth in *Drosophila*. *Genetics* 207,  
523 993-1006.
- 524 Lee, A., Scheuer, T., and Catterall, W.A. (2000). Ca<sup>2+</sup>/calmodulin-dependent facilitation and  
525 inactivation of P/Q-type Ca<sup>2+</sup> channels. *J Neurosci* 20, 6830-6838.
- 526 Lefebvre, S., Burglen, L., Reboullet, S., Clermont, O., Bulet, P., Viollet, L., Benichou, B., Cruaud,  
527 C., Millasseau, P., Zeviani, M., *et al.* (1995). Identification and characterization of a spinal muscular  
528 atrophy-determining gene. *Cell* 80, 155-165.
- 529 Li, X., Goel, P., Wondolowski, J., Paluch, J., and Dickman, D. (2018). A Glutamate Homeostat  
530 Controls the Presynaptic Inhibition of Neurotransmitter Release. *Cell reports* 23, 1716-1727.
- 531 Mahr, A., and Aberle, H. (2006). The expression pattern of the *Drosophila* vesicular glutamate  
532 transporter: a marker protein for motoneurons and glutamatergic centers in the brain. *Gene expression*  
533 *patterns* : *GEP* 6, 299-309.

- 534 Marder, E., and Goaillard, J.M. (2006). Variability, compensation and homeostasis in neuron and  
535 network function. *Nat Rev Neurosci* 7, 563-574.
- 536 Marie, B., Pym, E., Bergquist, S., and Davis, G.W. (2010). Synaptic homeostasis is consolidated by  
537 the cell fate gene gooseberry, a *Drosophila* pax3/7 homolog. *J Neurosci* 30, 8071-8082.
- 538 Martin, A.R. (1955). A further study of the statistical composition on the end-plate potential. *J Physiol*  
539 130, 114-122.
- 540 Meyer, F., and Aberle, H. (2006). At the next stop sign turn right: the metalloprotease Tolloid-related  
541 1 controls defasciculation of motor axons in *Drosophila*. *Development* 133, 4035-4044.
- 542 Müller, M., and Davis, G.W. (2012). Transsynaptic control of presynaptic Ca(2)(+) influx achieves  
543 homeostatic potentiation of neurotransmitter release. *Curr Biol* 22, 1102-1108.
- 544 Oliva, M.K., Perez-Moreno, J.J., O'Shaughnessy, J., Wardill, T.J., and O'Kane, C.J. (2020).  
545 Endoplasmic Reticulum Luminal Indicators in *Drosophila* Reveal Effects of HSP-Related Mutations  
546 on Endoplasmic Reticulum Calcium Dynamics. *Front Neurosci* 14, 816.
- 547 Petersen, S.A., Fetter, R.D., Noordermeer, J.N., Goodman, C.S., and DiAntonio, A. (1997). Genetic  
548 analysis of glutamate receptors in *Drosophila* reveals a retrograde signal regulating presynaptic  
549 transmitter release. *Neuron* 19, 1237-1248.
- 550 Pozo, K., and Goda, Y. (2010). Unraveling mechanisms of homeostatic synaptic plasticity. *Neuron* 66,  
551 337-351.
- 552 Raimer, A.C., Singh, S.S., Eedula, M.R., Paris-Davila, T., Vandadi, V., Spring, A.M., and Matera, A.G.  
553 (2020). Temperature-sensitive spinal muscular atrophy-causing point mutations lead to SMN  
554 instability, locomotor defects and premature lethality in *Drosophila*. *Dis Model Mech* 13.
- 555 Sen, A., Yokokura, T., Kankel, M.W., Dimlich, D.N., Manent, J., Sanyal, S., and Artavanis-Tsakonas,  
556 S. (2011). Modeling spinal muscular atrophy in *Drosophila* links Smn to FGF signaling. *J Cell Biol*  
557 192, 481-495.
- 558 Simkus, C.R., and Stricker, C. (2002). The contribution of intracellular calcium stores to mEPSCs  
559 recorded in layer II neurones of rat barrel cortex. *J Physiol* 545, 521-535.
- 560 Smith, L.A., Peixoto, A.A., Kramer, E.M., Villella, A., and Hall, J.C. (1998). Courtship and visual  
561 defects of cacophony mutants reveal functional complexity of a calcium-channel alpha1 subunit in  
562 *Drosophila*. *Genetics* 149, 1407-1426.
- 563 Spring, A.M., Brusich, D.J., and Frank, C.A. (2016). C-terminal Src Kinase Gates Homeostatic  
564 Synaptic Plasticity and Regulates Fasciclin II Expression at the *Drosophila* Neuromuscular Junction.  
565 *PLoS genetics* 12, e1005886.
- 566 Spring, A.M., Raimer, A.C., Hamilton, C.D., Schillinger, M.J., and Matera, A.G. (2019).  
567 Comprehensive Modeling of Spinal Muscular Atrophy in *Drosophila melanogaster*. *Frontiers in*  
568 *molecular neuroscience* 12, 113.
- 569 Summerville, J.B., Faust, J.F., Fan, E., Pendin, D., Daga, A., Formella, J., Stern, M., and McNew, J.A.  
570 (2016). The effects of ER morphology on synaptic structure and function in *Drosophila melanogaster*.  
571 *Journal of cell science* 129, 1635-1648.
- 572 Turrigiano, G.G. (2008). The self-tuning neuron: synaptic scaling of excitatory synapses. *Cell* 135,  
573 422-435.
- 574 Vazquez-Martinez, O., Canedo-Merino, R., Diaz-Munoz, M., and Riesgo-Escovar, J.R. (2003).  
575 Biochemical characterization, distribution and phylogenetic analysis of *Drosophila melanogaster*

- 576 ryanodine and IP3 receptors, and thapsigargin-sensitive Ca<sup>2+</sup> ATPase. *Journal of cell science* *116*,  
577 2483-2494.
- 578 Venkatesh, K., and Hasan, G. (1997). Disruption of the IP3 receptor gene of *Drosophila* affects larval  
579 metamorphosis and ecdysone release. *Curr Biol* *7*, 500-509.
- 580 Wang, X., Pinter, M.J., and Rich, M.M. (2016). Reversible Recruitment of a Homeostatic Reserve Pool  
581 of Synaptic Vesicles Underlies Rapid Homeostatic Plasticity of Quantal Content. *J Neurosci* *36*, 828-  
582 836.
- 583 Wilcox, R.A., Primrose, W.U., Nahorski, S.R., and Challiss, R.A. (1998). New developments in the  
584 molecular pharmacology of the myo-inositol 1,4,5-trisphosphate receptor. *Trends Pharmacol Sci* *19*,  
585 467-475.
- 586 Yeates, C.J., Zwiefelhofer, D.J., and Frank, C.A. (2017). The Maintenance of Synaptic Homeostasis at  
587 the *Drosophila* Neuromuscular Junction Is Reversible and Sensitive to High Temperature. *eNeuro* *4*.
- 588 Zhao, C., Dreosti, E., and Lagnado, L. (2011). Homeostatic synaptic plasticity through changes in  
589 presynaptic calcium influx. *J Neurosci* *31*, 7492-7496.
- 590 Zhao, F., Li, P., Chen, S.R., Louis, C.F., and Fruen, B.R. (2001). Dantrolene inhibition of ryanodine  
591 receptor Ca<sup>2+</sup> release channels. Molecular mechanism and isoform selectivity. *J Biol Chem* *276*,  
592 13810-13816.

593

## 594 6 Figure Legends

595 **Figure 1. Presynaptic homeostatic depression (PHD) works successfully with a recombinant line**  
596 **of *OK371-Gal4* and *UAS-VGlut*.** (A) NMJ electrophysiological data for miniature excitatory postsyn-  
597 aptic potentials (mEPSP), excitatory postsynaptic potentials (EPSP), and quantal content (QC). Data  
598 are normalized to WT (*w<sup>1118</sup>*) values. *VGlut*, *OK371/+* NMJs have increased mEPSP but normal EPSP  
599 because of decreased QC, indicative of successful PHD. (\*\*\*)  $p < 0.001$  vs. WT by one-way ANOVA  
600 with Tukey's post-hoc). (B) Representative electrophysiological traces. Large traces are EPSPs; small  
601 traces are mEPSPs. Scale bars for EPSPs (mEPSPs) are 5 mV (1 mV) and 50 ms (1000 ms). (C) Raw  
602 data for mEPSPs. (D) Raw data for EPSPs. (E) Raw data for QC. For (C)-(E), bars are averages and  
603 error bars are  $\pm$  SEM. (\*\*\*)  $p < 0.001$  vs. WT or vs. *OK371/+*; #  $p < 0.05$  vs. *OK371/+*; analyses by  
604 one-way ANOVA with Tukey's post-hoc.

605  
606 **Figure 2. A screen to uncover conditions with defective PHD.** (A) Crossing scheme for generating  
607 larvae for electrophysiological recording. Each animal recorded had a homeostatic challenge provided  
608 by *VGlut* overexpression and a concurrent heterozygous or RNAi condition. (B) Data distribution for  
609 screened conditions (x-axis = average EPSP for condition; y-axis = average QC for condition). Green  
610 = *UAS-VGlut*, *OK371-Gal4/+*. Red = *UAS-VGlut*, *OK371-Gal4/RyRE4340K*; *itpr90B/+*. Purple =  
611 *UAS-VGlut*, *OK371-Gal4/+*; *UAS-Smn[RNAi]<sup>JF02057/+</sup>*. Dotted line: EPSP value two standard devia-  
612 tions below *UAS-VGlut*, *OK371-Gal4/+* chosen as a cut off for potential follow-up hits. (C) Average  
613 EPSPs for screened conditions. All conditions have a *UAS-VGlut*, *OK371-Gal4/+* genetic background.  
614 ">" denotes as *UAS* construct or RNAi line being driven in motor neurons by *OK371-Gal4*. "+" denotes  
615 additional mutations present as heterozygotes. Top dotted line denotes *UAS-VGlut*, *OK371-Gal4/+*  
616 average. Bottom dotted line denotes two standard deviations below *UAS-VGlut*, *OK371-Gal4/+* aver-  
617 age.  
618

619 **Figure 3. Double heterozygous loss of the *itpr* and *RyR* genes causes excess depression.** Note:  
620 Traces and data for *OK371/+* and *VGlut, OK371/+* are repeated from Figure 1 for comparison pur-  
621 poses. Abbreviations are as in Figure 1 as well. **(A)** NMJ electrophysiological data for mEPSP, EPSP,  
622 and QC. Data are normalized to *OK371/+* values. \*  $p < 0.05$ , \*\*  $p < 0.01$ , and \*\*\*  $p < 0.001$  vs.  
623 *OK371/+*; ##  $p < 0.01$  and ###  $p < 0.001$  vs. *OK371/RyRE4340K; itpr<sup>90B/+</sup>*; analyses by one-way  
624 ANOVA with Tukey's post-hoc. **(B)** Raw data for mEPSPs. **(C)** Raw data for EPSPs. **(D)** Raw data  
625 for QC. For (B)-(D), bars are averages and error bars are  $\pm$  SEM. \*  $p < 0.05$ , \*\*  $p < 0.01$ , and \*\*\*  $p <$   
626  $0.001$  by one-way ANOVA with Tukey's post-hoc. **(E)** Representative electrophysiological traces with  
627 S.D. and range values for EPSPs shown. The evoked amplitude S.D. and range were significantly  
628 higher for *VGlut, OK371/RyRE4340K; itpr<sup>90B/+</sup>* vs. its genetic control, *OK371/RyRE4340K; itpr<sup>90B/+</sup>*. \*  $p$   
629  $< 0.05$ , \*\*  $p < 0.01$  by one-way ANOVA with Tukey's post-hoc. Scale bars as in Figure 1.

630  
631 **Figure 4. Genetic impairment of *itpr* combined with pharmacological impairment of RyR causes**  
632 **excess depression.** **(A)** Raw data for mEPSPs (left); raw data for EPSPs (middle); raw data for QC  
633 (right). All data are for the indicated NMJ genotypes with 25  $\mu$ M Dantrolene; bars are averages and  
634 error bars are  $\pm$  SEM. \*  $p < 0.05$ , \*\*  $p < 0.01$ , and \*\*\*  $p < 0.001$  by one-way ANOVA with Tukey's  
635 post-hoc. **(B)** Representative EPSP traces. Scale bars are as in Figure 1.

636  
637 **Figure 5. Additional pharmaco-genetic combinations cause excess depression.** **(A)** Raw data for  
638 mEPSPs (left); raw data for EPSPs (middle); raw data for QC (right). All data are for the indicated  
639 NMJ genotypes with 25  $\mu$ M Dantrolene; bars are averages and error bars are  $\pm$  SEM. **(B)** Data as in  
640 (A) but with 20  $\mu$ M Xestospongine C instead of Dantrolene. **(C)** Representative EPSP traces. Scale bars  
641 are as in Figure 1. \*  $p < 0.05$ , \*\*  $p < 0.01$ , and \*\*\*  $p < 0.001$  by Student's T-Test comparing a control  
642 dataset (no *VGlut* overexpression) vs. an experimental dataset (*VGlut* overexpression).

643  
644 **Figure 6.  $Ca^{2+}$  concentration-sensitivity of PHD execution.** **(A)** Log-log plots of recording saline  
645 [ $Ca^{2+}$ ] vs. QC corrected for non-linear summation for WT, *OK371/+*, and *VGlut, OK371/+* conditions.  
646 Across the range of [ $Ca^{2+}$ ] examined, there is no significant difference in calcium cooperativity for  
647 these conditions (Nonlinear Regression,  $p = 0.91$ ). **(B)** Data plotted as in (A) but this time with a double  
648 heterozygous *RyRE4340K/+; itpr<sup>90B/+</sup>* genetic background. Across the range of [ $Ca^{2+}$ ] examined, there  
649 is no significant difference in calcium cooperativity for these conditions (Nonlinear Regression,  $p =$   
650  $0.78$ ). **(C)** Raw data for mEPSPs (left); raw data for EPSPs (middle); raw data for QC (right). All data  
651 are for the indicated NMJ genotypes in 0.2 mM [ $Ca^{2+}$ ]; bars are averages and error bars are  $\pm$  SEM.  
652 For mEPSPs, \*  $p < 0.05$  and \*\*\*  $p < 0.001$  by Student's T-Test, comparing PHD-challenged genotypes  
653 vs. unchallenged genetic controls. For EPSPs and QC, \*  $p < 0.05$ , \*\*  $p < 0.01$ , and \*\*\*  $p < 0.001$  vs.  
654 *OK371/+*; ##  $p < 0.01$ ; EPSP and QC analyses done across multiple genotypes by one-way ANOVA  
655 with Tukey's post-hoc.

656  
657 **Figure 7. Partial impairment of *Cav2*/Cacophony causes excess depression.** **(A)** Crossing scheme  
658 for generating larvae for electrophysiological recording. Male larvae were hemizygous for the *cac<sup>S</sup>*  
659 hypomorphic mutation. **(B)** Raw data for mEPSPs. **(C)** Raw data for EPSPs. **(D)** Raw data for QC. For  
660 (B)-(D), bars are averages and error bars are  $\pm$  SEM. \*  $p < 0.05$ , \*\*  $p < 0.01$ , and \*\*\*  $p < 0.001$  by  
661 Student's T-Test comparing the control *cac<sup>S</sup>* dataset (no *VGlut* overexpression) vs. the experimental  
662 *cac<sup>S</sup>* dataset (*VGlut* overexpression).

663  
664 **Figure 8. Model for how multiple calcium sources tune the process of PHD.** Under baseline con-  
665 ditions, *Cav2*-type calcium channels contribute to synapse function, as may RyRs and IP<sub>3</sub>Rs. Under  
666 conditions inducing PHD, synaptic vesicles are enlarged, and QC is decreased, possibly through



667 regulation of sources of calcium. When PHD challenge is coupled with concomitant impairment of  
668 RyR and IP<sub>3</sub>R channels, evoked potentials are significantly diminished, due to excess PHD.  
669

## 670 **7 Conflict of Interest**

671 The authors declare that the research was conducted in the absence of any commercial or financial  
672 relationships that could be construed as a potential conflict of interest.

## 673 **8 Author Contributions**

674 C.J.Y. and C.A.F. both did the following: designed research, performed research, analysed data, and  
675 wrote and edited the paper.

## 676 **9 Funding**

677 Funding supporting this work includes an NSF Grant (1557792) and an NIH/NINDS Grant  
678 (R01NS085164) to C.A.F. C.J.Y. was supported in part by an NIH/NINDS Predoctoral Training Grant  
679 to the University of Iowa (UI) Interdisciplinary Graduate Program in Neuroscience (T32NS007421  
680 – PI Daniel T. Tranel), as well as a post-comprehensive exam predoctoral summer fellowship and a  
681 Ballard and Seashore Dissertation fellowship via the Graduate College at UI.

## 682 **10 Acknowledgments**

683 We thank members of the Frank lab for helpful comments. We thank the laboratories of Drs. Tina  
684 Tootle, Fang Lin, Toshihiro Kitamoto, Pamela Geyer, and Lori Wallrath for helpful discussions. We  
685 also thank Drs. Toshihiro Kitamoto, Joshua Weiner, Christopher Stipp, and Mark Stamnes for helpful  
686 feedback on an earlier written version of this study.

## 687 **11 Supplementary Material**

688 Please see Supplementary Table S1 for raw data from the electrophysiology screen and a legend ex-  
689 plaining the table.

690

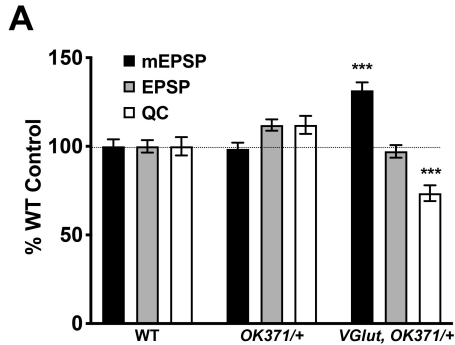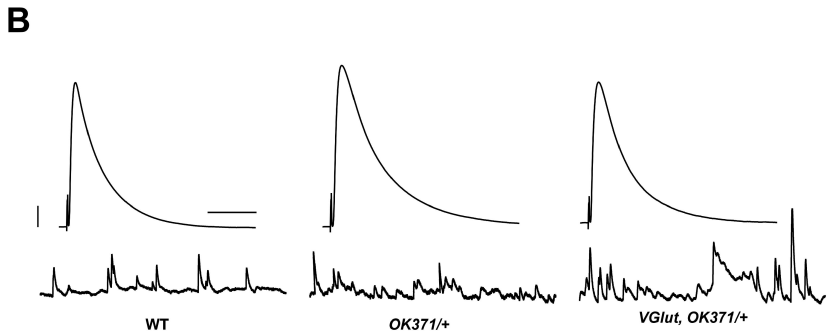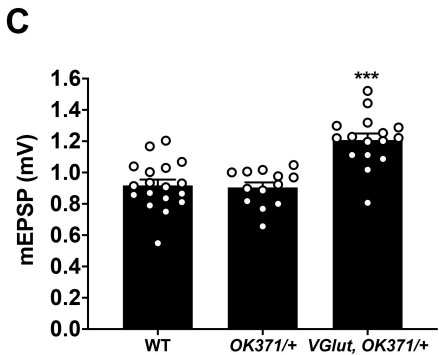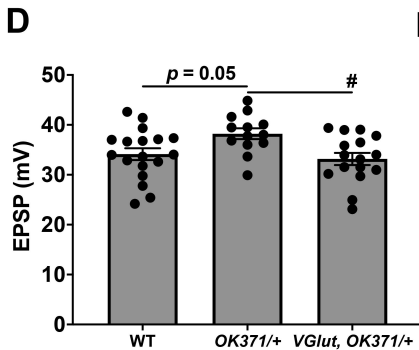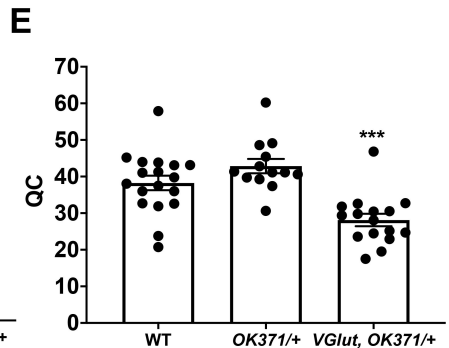

**A**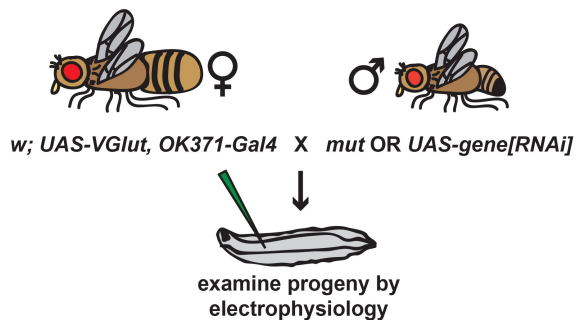**B**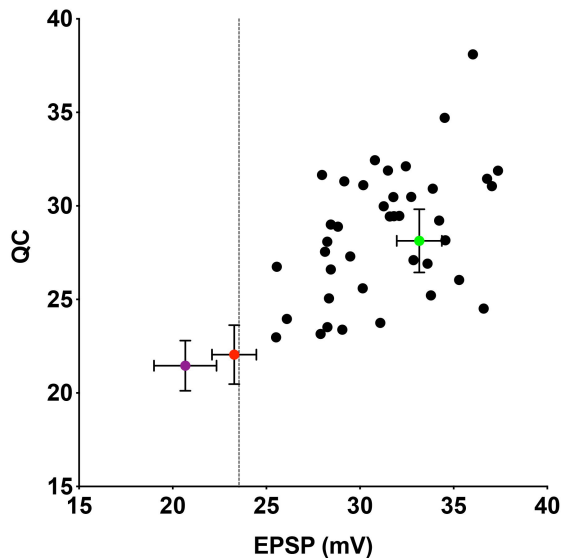**C**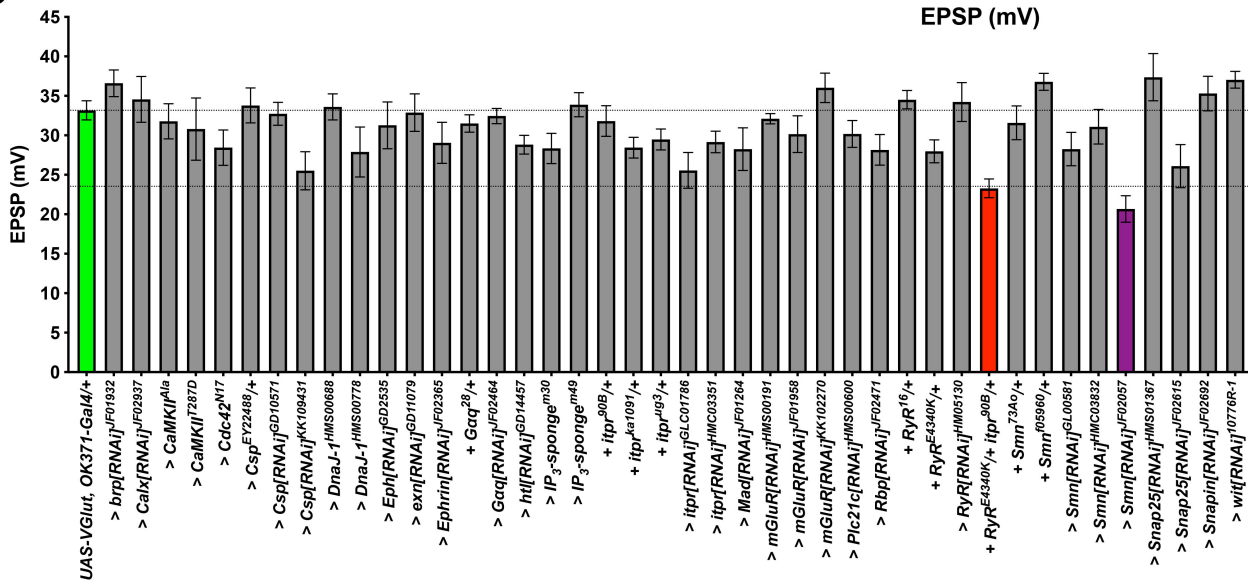

**A**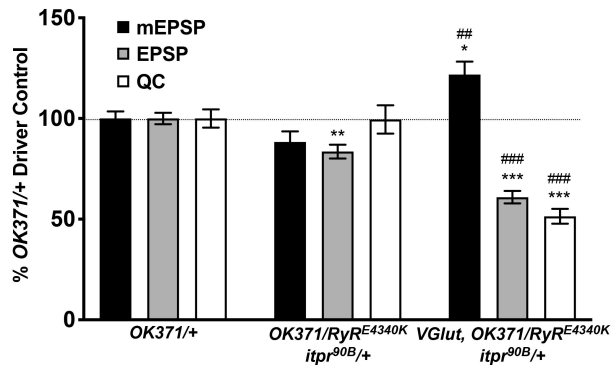**B**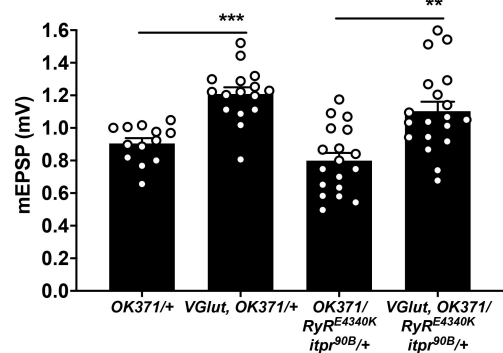**C**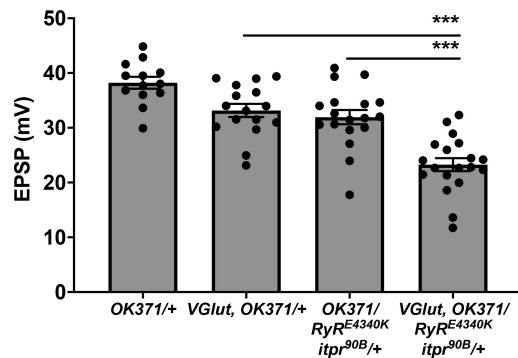**D**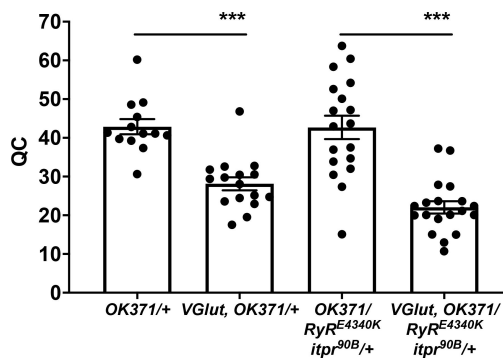**E**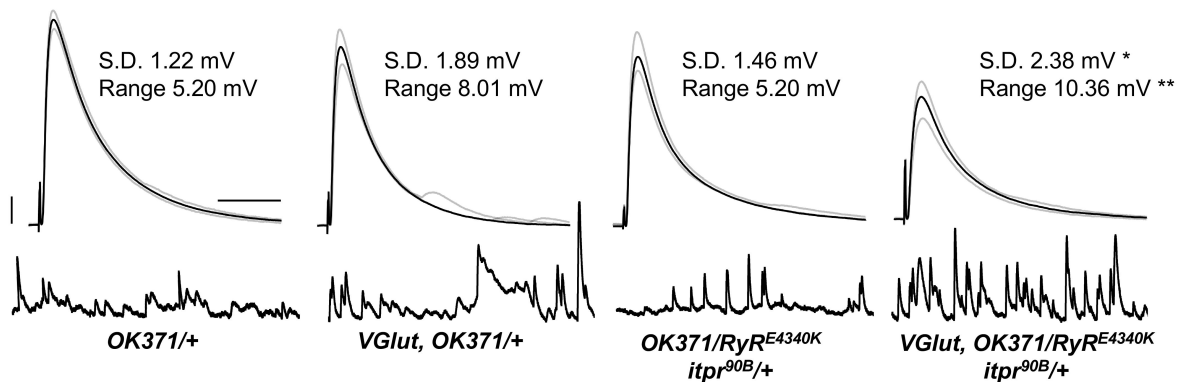



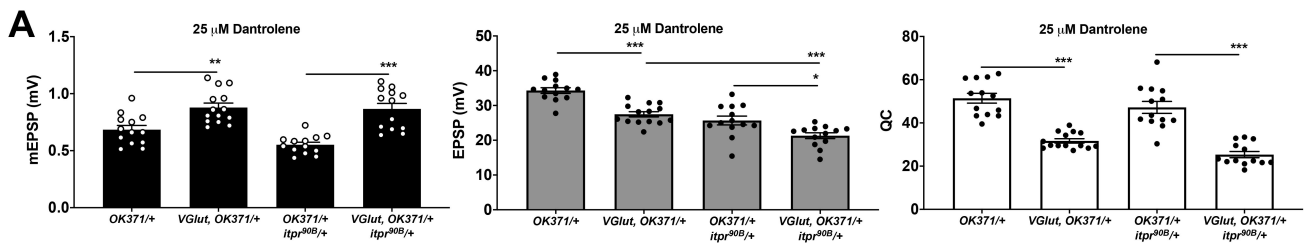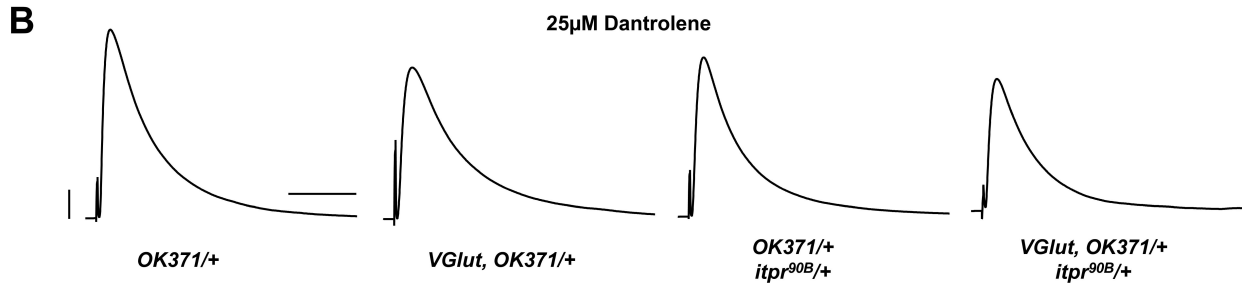

**A**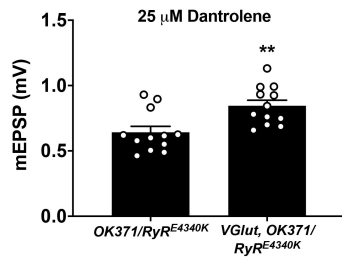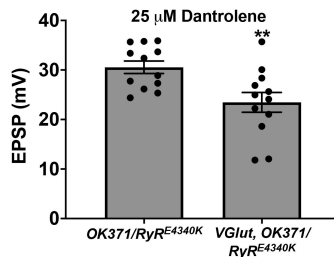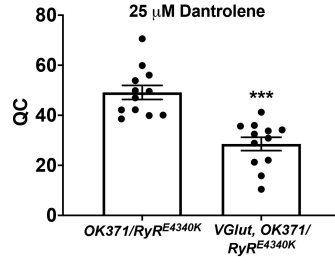**B**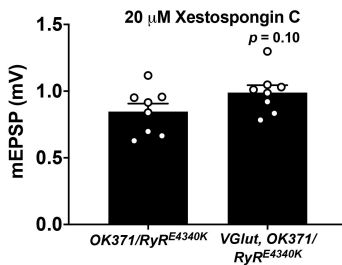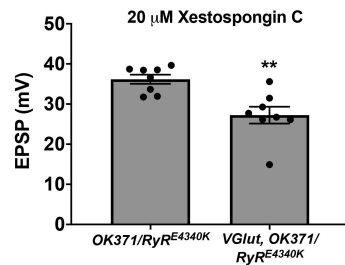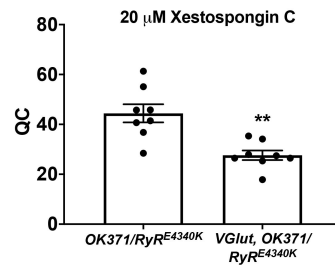**C**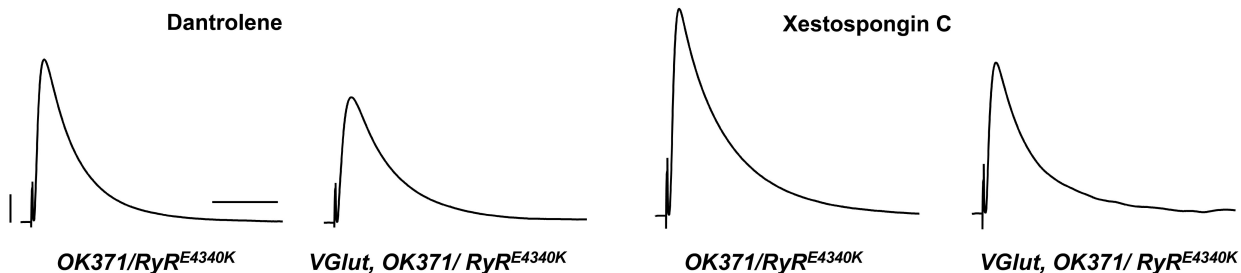

**A**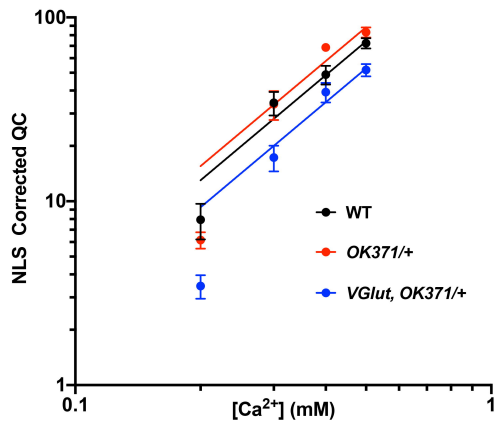**B**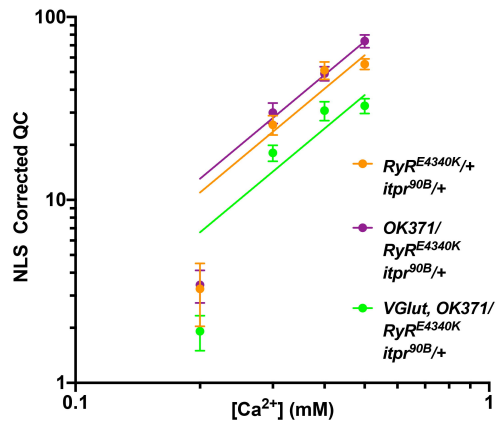**C**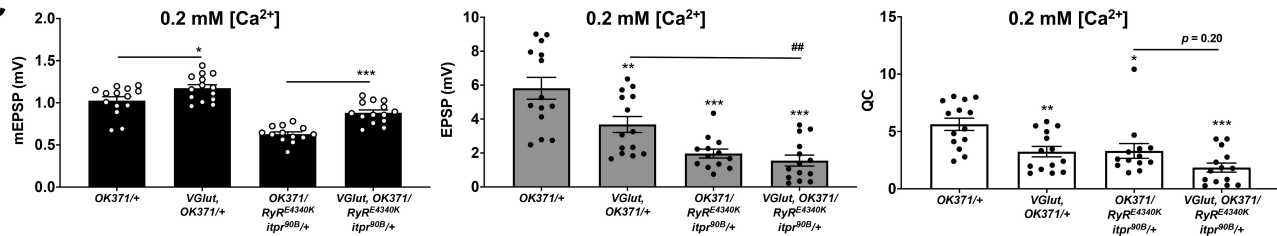

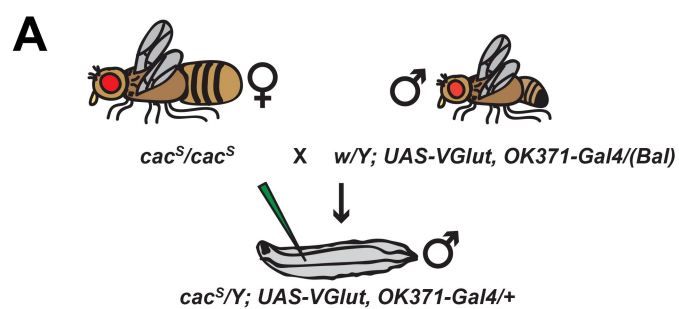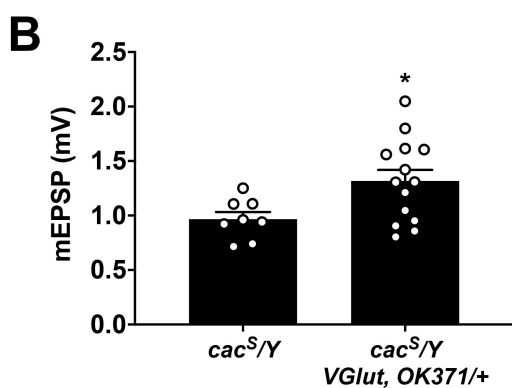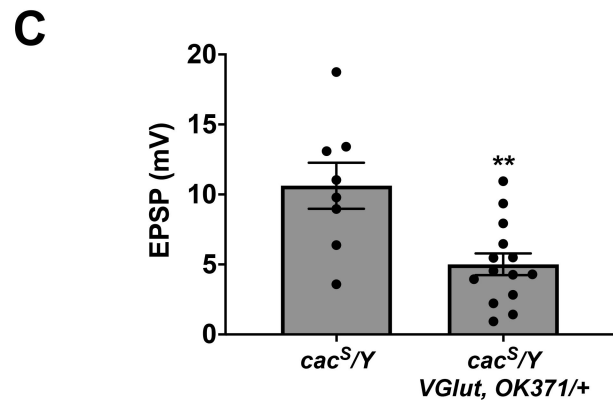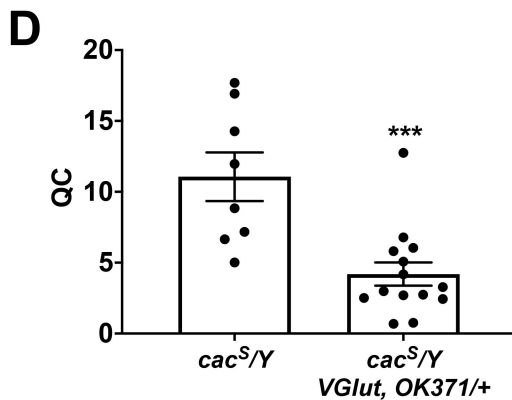

WT

Homeostatic Depression

Homeostatic Depression  
+ *RyR itpr* Impairment

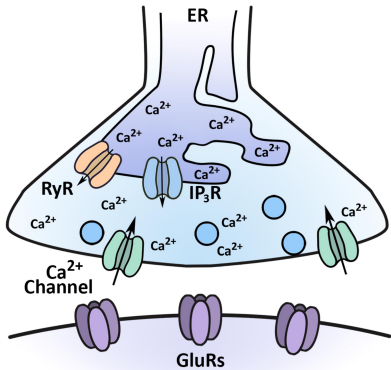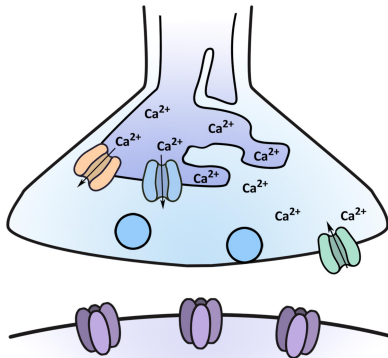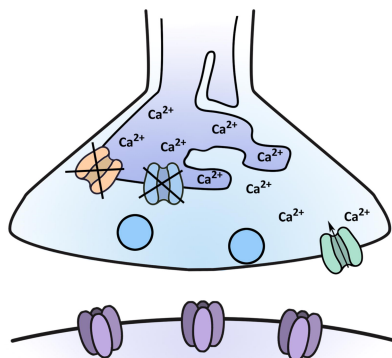

Evoked potentials normal

Evoked potentials  $\approx$  normal

Evoked potentials small
